# Supplementary material for: PEGylated W4.6N4/WO3 nanoparticles as a near-infrared photothermal agent for effective cancer therapy
Source: Royal Society of Chemistry journal article supplement (doi:10.1039/d5tb00665a), 2025-01-01
Supplement: d5tb00665a1.pdf [file d5tb00665a1.pdf]

## Supplementary Figures

### **PEGylated $W_{4.6}N_4/WO_3$ nanoparticles as a near- infrared photothermal agent for effective cancer therapy**

Rui Yang<sup>1</sup>, Jianping Li<sup>2</sup>, Hao Song<sup>2</sup>, Cong Wang<sup>3\*</sup>, Na Xu<sup>1\*</sup>

<sup>1</sup>Institute of Biology and Medicine, College of Life Sciences and Health, Wuhan University of Science and Technology, Wuhan 430081, P. R. China

<sup>2</sup>The State Key Laboratory of Refractories and Metallurgy, Institute of Advanced Materials and Nanotechnology, Wuhan University of Science and Technology, Wuhan 430081, P. R. China

<sup>3</sup>Department of Applied Physics, College of Science, Wuhan University of Science and Technology, Wuhan 430081, P. R. China

#### **Competing Interests**

The authors declare no competing interests.

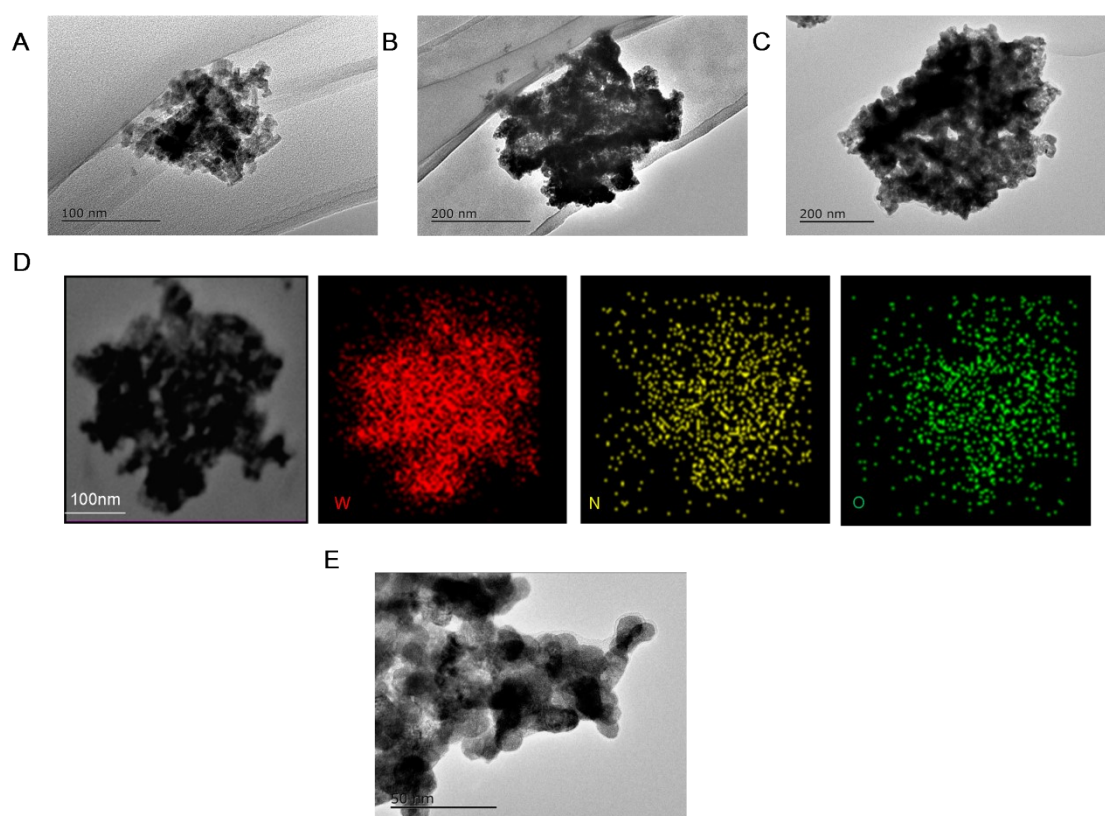

**Figure S1.** The characterization of prepared nanomaterials. (A) TEM images of  $\text{WO}_3$  NPs, scale bar: 200nm, (B) TEM images of  $\text{W}_{4.6}\text{N}_4/\text{WO}_3$  NPs, scale bar:200 nm, (C) TEM images of PEGylated  $\text{W}_{4.6}\text{N}_4/\text{WO}_3$  NPs, scale bar:200 nm, (D) The element mappings of  $\text{W}_{4.6}\text{N}_4/\text{WO}_3$  NPs. From left to right: high-angle annular dark-field image, W, N, and O elements, respectively. scale bar: 100 nm, (E) TEM image of . PEGylated  $\text{W}_{4.6}\text{N}_4/\text{WO}_3$  NPs depicted the PEG layer, scale bar: 50 nm.

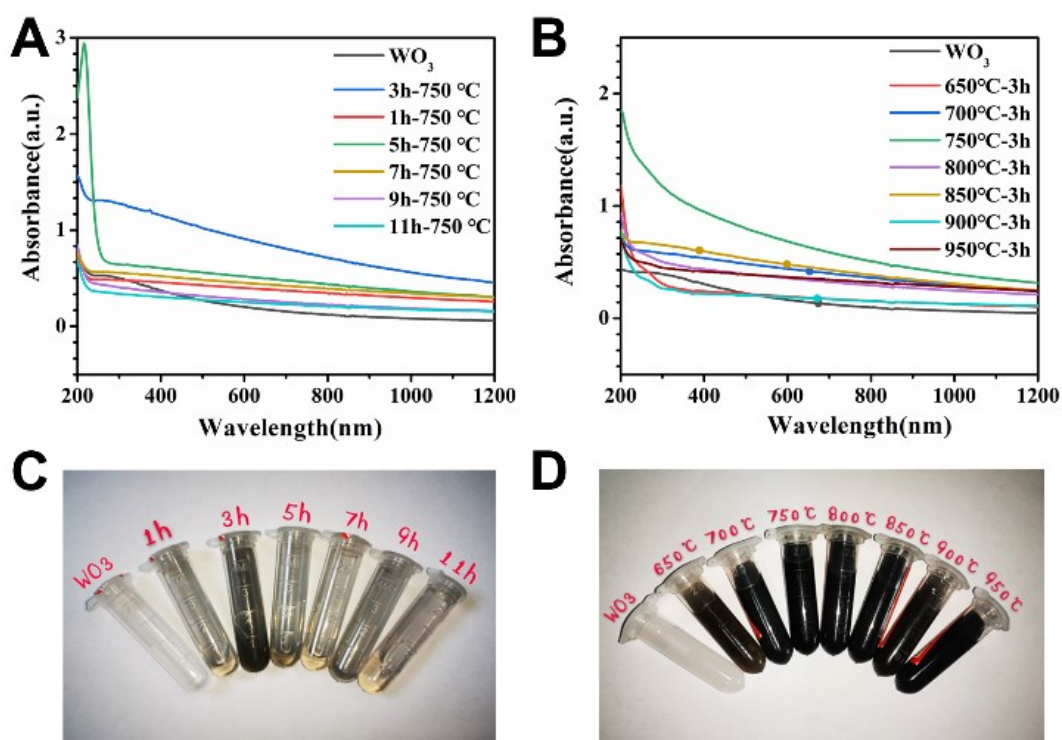

**Figure S2.** The absorption spectra and aqueous solution images of the products after nitridation. The absorption spectrum (A) and aqueous solution images (C) of the nitrided products for different hours at 750 °C. (B) and (D) are the absorption spectra and aqueous solution images of the nitridation products at different temperature for 3 hours.

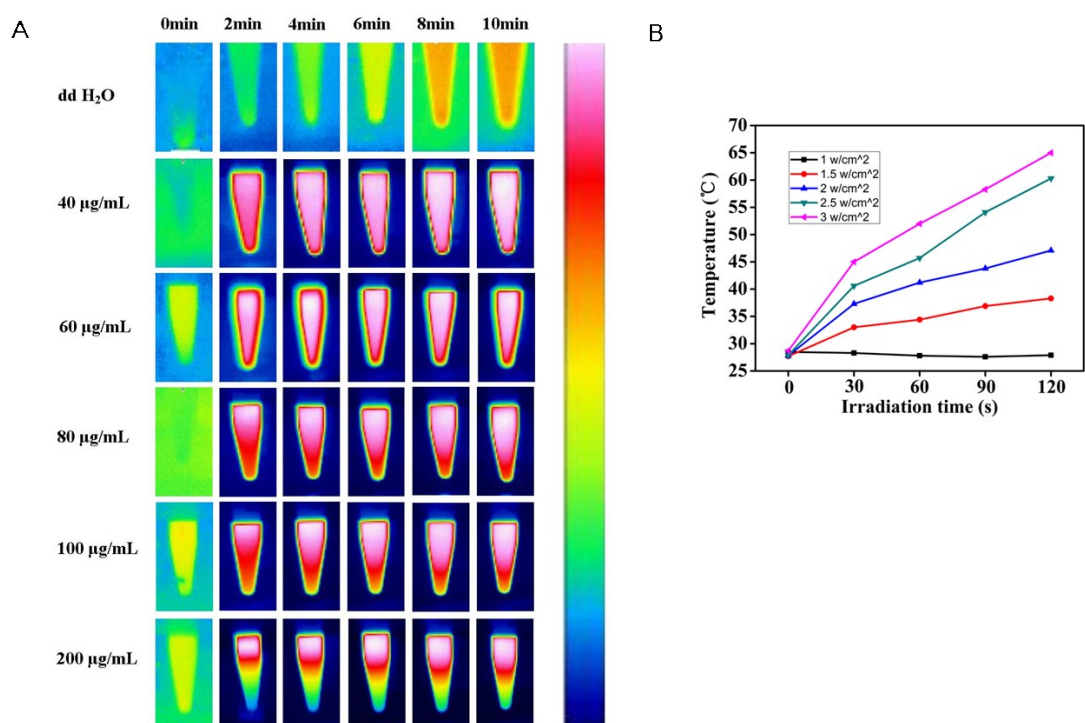

**Figure S3.** The photothermal property influencing factors of PEGylated  $W_{4.6}N_4/WO_3$  NPs. (A) The thermal images of PEGylated  $W_{4.6}N_4/WO_3$  NPs solution of different concentrations irradiated by 808 nm laser with the 3.0  $W/cm^2$  power density. (B) The temperature rise curves of 200  $\mu g/mL$  PEGylated  $W_{4.6}N_4/WO_3$  NPs irradiated by 808 nm laser at different power density.

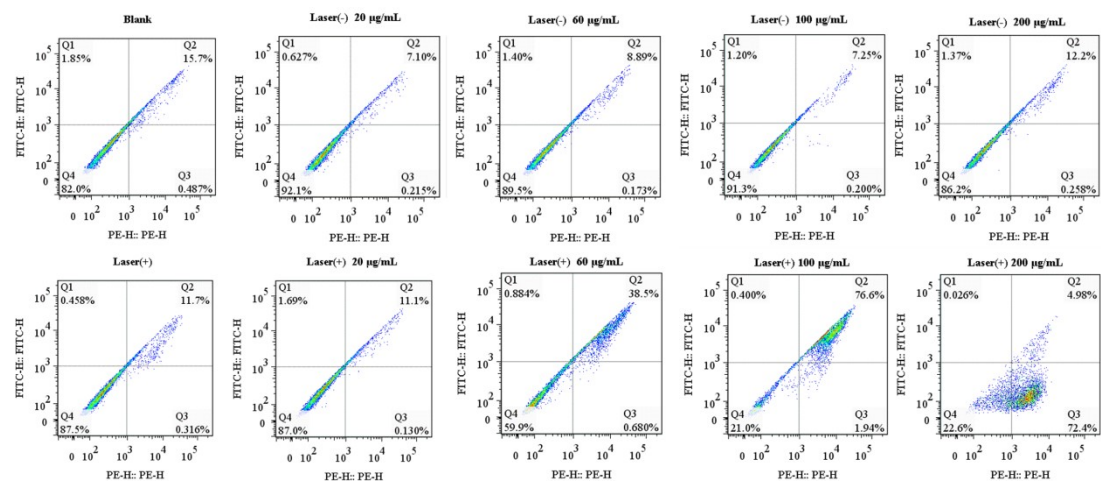

**Figure S4.** Flow cytometry of HeLa cells incubated with PEGylated  $W_{4.6}N_4/WO_3$  NPs at different concentrations with or without irradiated for 5 min with 3.0  $W/cm^2$  808 nm laser.

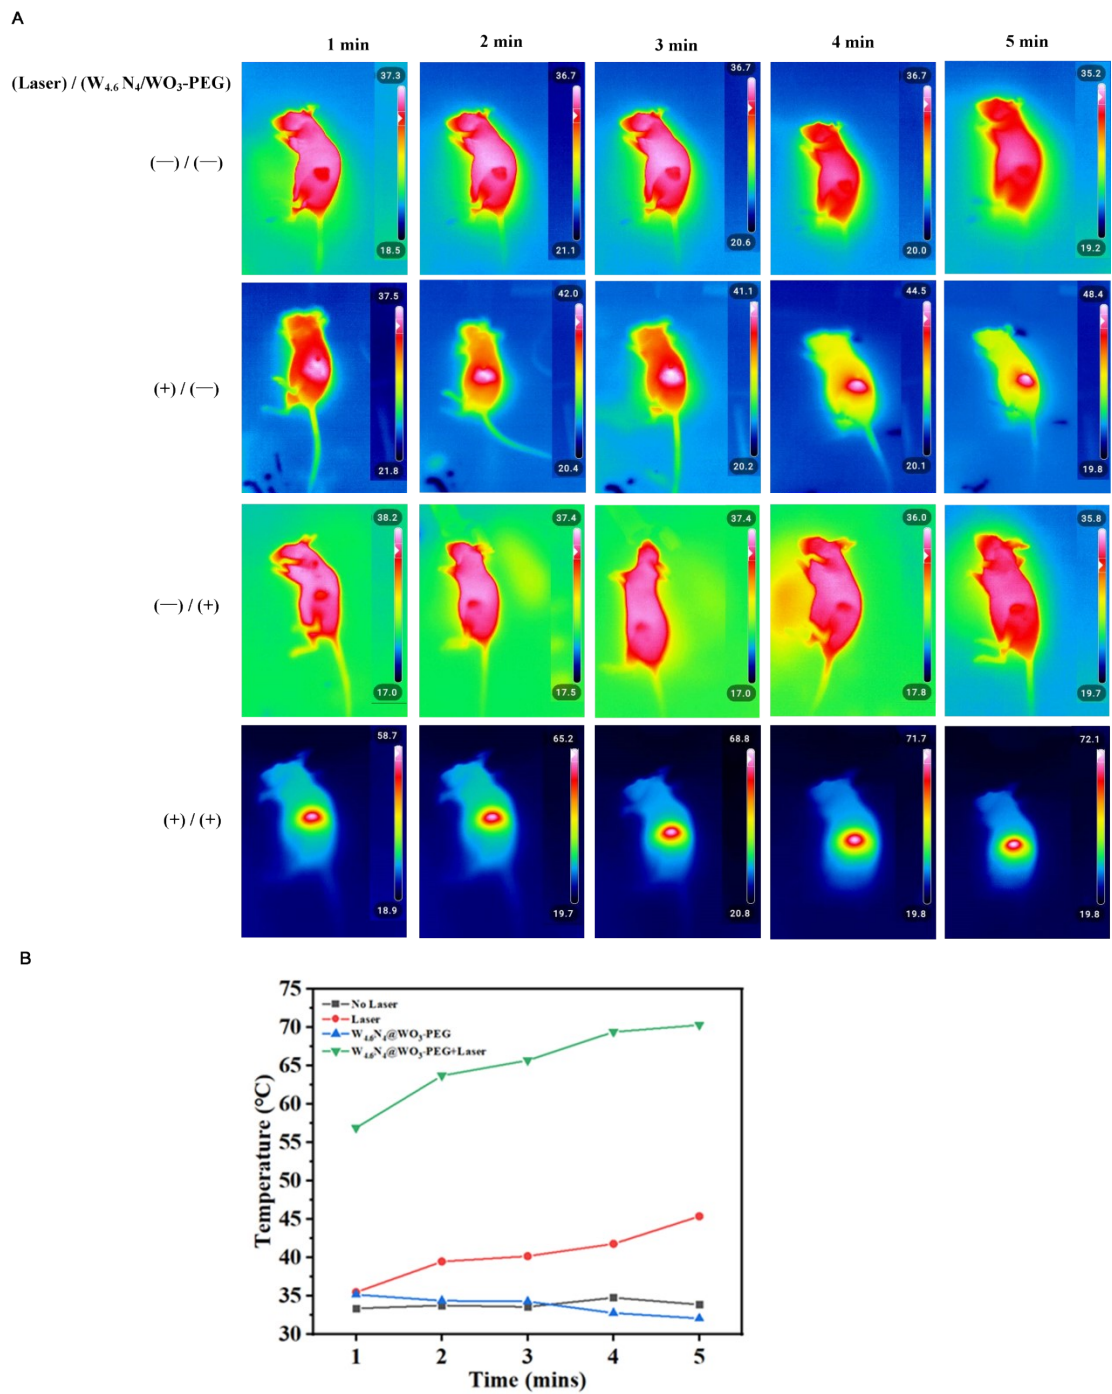

**Figure S5.** (A) Thermal images of tumor-bearing mice when treated with or without Laser or  $W_{4.6}N_4/WO_3$ -PEG NPs, (B) The temperature change curves from images.

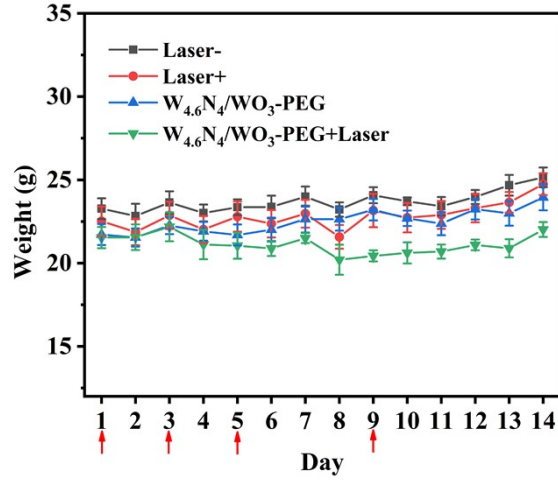

**Figure S6.** The weight change curves of mice with different treatments.

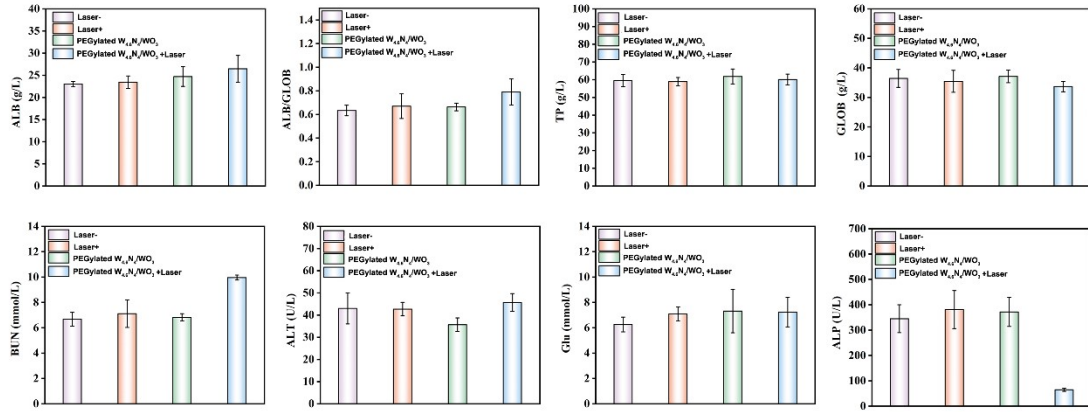

**Figure S7.** Blood biochemical detection results of tumor-bearing mice in four experimental groups after photothermal treatment.
